# Supplementary material
Source: MDPI journal article supplement (https://www.mdpi.com/2227-9717/9/7/1095)
Supplement: s1 [file s1]

## Synthesis, characterization and ecotoxicity evaluation of biochar-derived carbon dots from Spruce tree, Purple moor-grass and African oil palm

Kaory Barrientos<sup>1\*</sup> , Maria Isabel Gaviria<sup>2\*</sup> , Juan Pablo Arango<sup>1</sup> , Jersson Placido<sup>3, 6</sup> , Sandra Bustamante<sup>3, 4, 6</sup> , Martha Elena Londoño<sup>1</sup> , Marisol Jaramillo<sup>1</sup> 

<sup>1</sup>GIBEC Research group. Life Sciences Faculty. Universidad EIA. Calle 25 sur # 42-73.  
E-mail: kaory.barrientos@eia.edu.co

\* Corresponding autor.

**Table S1** Physicochemical analysis of *Molinia caerulea* biochar

| Physicochemical analysis of <i>Molinia caerulea</i> biochar |                                      |          |        |                   |
|-------------------------------------------------------------|--------------------------------------|----------|--------|-------------------|
| Parameter                                                   | Method                               | Norm     | Result | Unit              |
| Density (20 °C)                                             | Gravimetry                           | NTC 5167 | 0.09   | g/cm <sup>3</sup> |
| Total oxidizable organic Carbon                             | Titulometry                          | NTC 5167 | 5.91   | %                 |
| Humidity                                                    | Gravimetry                           | NTC 5167 | 4.87   | %                 |
| Total Cd                                                    | Atomic Absorption                    | SM 3111B | < 0.1  | ppm               |
| Total Cr                                                    | Atomic Absorption                    | SM 3111B | < 1.0  | ppm               |
| Total Ni                                                    | Atomic Absorption                    | SM 3111B | < 0.2  | ppm               |
| Total Pb                                                    | Atomic Absorption                    | SM 3111B | < 0.5  | ppm               |
| Hg                                                          | Cold Vapor Atomic Absorption         | SM 3112A | < 0.01 | ppm               |
| As                                                          | Hydride Generation/Atomic Absorption | SM 3114C | < 0.01 | ppm               |

**Table S2** Physicochemical analysis of *Elaeis guineensis* biochar

| Physicochemical analysis of <i>Elaeis guineensis</i> biochar |                   |          |        |                   |
|--------------------------------------------------------------|-------------------|----------|--------|-------------------|
| Parameter                                                    | Method            | Norm     | Result | Unit              |
| Density (20 °C)                                              | Gravimetry        | NTC 5167 | 0.54   | g/cm <sup>3</sup> |
| Total oxidizable organic Carbon                              | Titulometry       | NTC 5167 | 8.51   | %                 |
| Humidity                                                     | Gravimetry        | NTC 5167 | 7.79   | %                 |
| Total Cd                                                     | Atomic Absorption | SM 3111B | < 0.1  | ppm               |
| Total Cr                                                     | Atomic Absorption | SM 3111B | < 1.0  | ppm               |

|          |                                      |          |        |     |
|----------|--------------------------------------|----------|--------|-----|
| Total Ni | Atomic Absorption                    | SM 3111B | < 0.2  | ppm |
| Total Pb | Atomic Absorption                    | SM 3111B | < 0.5  | ppm |
| Hg       | Cold Vapor Atomic Absorption         | SM 3112A | < 0.01 | ppm |
| As       | Hydride Generation/Atomic Absorption | SM 3114C | < 0.01 | ppm |
